## P-TYPE $\text{Ca}^{2+}$ CURRENT IN CRAYFISH PEPTIDERGIC NEURONES

JESÚS GARCÍA-COLUNGA<sup>1</sup>, RENÉ VALDIOSERA<sup>2</sup> AND UBALDO GARCÍA<sup>2,\*</sup>

<sup>1</sup>Center of Neurobiology, National University of Mexico, Campus Juriquilla, Querétaro, 76001 México and

<sup>2</sup>Department of Physiology, Biophysics and Neuroscience, CINVESTAV, 07000 México

\*Author for correspondence (e-mail: ugarcia@fisio.cinvestav.mx)

Accepted 18 November 1998; published on WWW 21 January 1999

### Summary

Inward  $\text{Ca}^{2+}$  current through voltage-gated  $\text{Ca}^{2+}$  channels was recorded from freshly dissociated crayfish X-organ (XO) neurones using the whole-cell voltage-clamp technique. Changing the holding potential from  $-50$  to  $-90$  mV had little effect on the characteristics of the current–voltage relationship: neither the time course nor the amplitude of the  $\text{Ca}^{2+}$  current was affected. Inactivation of the  $\text{Ca}^{2+}$  current was observed over a small voltage range, between  $-35$  and  $-10$  mV, with half-inactivation at  $-20$  mV. The activation of the  $\text{Ca}^{2+}$  current was modelled using Hodgkin–Huxley kinetics. The time constant of activation,  $\tau_m$ , was  $568 \pm 66$   $\mu\text{s}$  at  $-20$  mV and decreased gradually to  $171 \pm 23$   $\mu\text{s}$  at  $40$  mV (means  $\pm$  S.E.M.,  $N=5$ ). The steady-state activation,  $m_\infty$ , was fitted with a Boltzmann function, with a half-activation voltage of  $-7.45$  mV and an apparent threshold at  $-40$  mV. The instantaneous current–voltage relationship was adjusted using the Goldman–Hodgkin–Katz constant-field equation, giving a permeation of  $4.95 \times 10^{-5}$   $\text{cm}^2 \text{s}^{-1}$ . The inactivation of the  $\text{Ca}^{2+}$  current in XO neurones was dependent on previous entry of  $\text{Ca}^{2+}$ . Using a double-pulse protocol, the inactivation was fitted to a U-shaped curve with a maximal inactivation of 35% at  $30$  mV. The time course of the

recovery from inactivation was fitted with an exponential function. The time constants were  $17 \pm 2.6$  ms for a prepulse of  $10$  ms and  $31 \pm 3.2$  ms for a prepulse of  $20$  ms. The permeability sequence of the  $\text{Ca}^{2+}$  channels was as follows:  $\text{Ba}^{2+} > \text{Sr}^{2+} \approx \text{Ca}^{2+} \gg \text{Mg}^{2+}$ . Other divalent cations blocked the  $\text{Ca}^{2+}$  current, and their effects were voltage-dependent; the potency of blockage was  $\text{Cd}^{2+} \approx \text{Zn}^{2+} \gg \text{Co}^{2+} \approx \text{Ni}^{2+}$ . The peptide  $\omega$ -agatoxin-IVA, a selective toxin for P-type  $\text{Ca}^{2+}$  channels, blocked 85% of the  $\text{Ca}^{2+}$  current in XO neurones at  $200$   $\text{nmol l}^{-1}$ , but the current was insensitive to dihydropyridines, phenylalkylamines,  $\omega$ -conotoxin-GVIA and  $\omega$ -conotoxin-MVIIC, which are blockers of L-, N- and Q-type  $\text{Ca}^{2+}$  channels, respectively. From the voltage- and  $\text{Ca}^{2+}$ -dependent kinetics, the higher permeability to  $\text{Ba}^{2+}$  than to  $\text{Ca}^{2+}$  and the higher sensitivity of the current to  $\text{Cd}^{2+}$  than to  $\text{Ni}^{2+}$ , we conclude that the  $\text{Ca}^{2+}$  current in XO neurones is generated by high-voltage-activated (HVA) channels. Furthermore, its blockage by  $\omega$ -agatoxin-IVA suggests that it is mainly generated through P-type  $\text{Ca}^{2+}$  channels.

Key words: P-type  $\text{Ca}^{2+}$  current,  $\omega$ -agatoxin-IVA, crayfish, peptidergic neurone, *Procambarus clarkii*.

### Introduction

Entry of  $\text{Ca}^{2+}$  through voltage-dependent  $\text{Ca}^{2+}$  channels plays an important role in excitable cells and is related to their electrical activity. The opening of  $\text{Ca}^{2+}$  channels transiently increases the intracellular free  $\text{Ca}^{2+}$  concentration, which acts as messenger and may control ion channel gating, enzyme activation, gene expression, transmitter release, neurosecretion and other cell functions (for reviews, see Llinás et al., 1992; Miller, 1992; Tsien and Tsien, 1990).

Several classes of voltage-dependent  $\text{Ca}^{2+}$  channel have been identified in vertebrates on the basis of electrophysiological and pharmacological criteria and by molecular cloning (Sather et al., 1993; Snutch and Reiner, 1992). They are classified as low-voltage-activated (LVA) and high-voltage-activated (HVA)  $\text{Ca}^{2+}$  channels (Carbone and Lux, 1984; Fox et al., 1987; Swandulla et al., 1991; Tsien et al., 1988). LVA or T-type  $\text{Ca}^{2+}$  channels are sensitive to  $\text{Ni}^{2+}$ ,

amiloride, ethosuximide and octanol and are insensitive to 1,4-dihydropyridines (DHPs),  $\omega$ -conotoxin-GVIA and  $\omega$ -agatoxin-IVA (Coulter et al., 1989; Herrington and Lingle, 1992; Mori, 1994; Tang et al., 1988). HVA  $\text{Ca}^{2+}$  channels have been subdivided into five types: (a) L-type channels sensitive to DHPs (Fox et al., 1987; Hess et al., 1984); (b) N-type channels insensitive to DHPs and irreversibly blocked by  $\omega$ -conotoxin-GVIA (Aosaki and Kasai, 1989; Plummer et al., 1989); (c) P-type channels insensitive to DHPs and to  $\omega$ -conotoxin GVIA but selectively blocked by nanomolar concentrations of  $\omega$ -agatoxin-IVA ( $<30$   $\text{nmol l}^{-1}$ ) (Llinás et al., 1989; Mintz et al., 1992) and by funnel-web spider toxin (Wang and Lemos, 1994); (d) Q-type channels blocked by  $\omega$ -agatoxin-TK and by higher concentrations of  $\omega$ -agatoxin IVA ( $>100$   $\text{nmol l}^{-1}$ ) and which differ from P-type channels in their sensitivity to  $\omega$ -conotoxin-MVIIC ( $<150$   $\text{nmol l}^{-1}$ ) (Hillyard et

al., 1992; Wang et al., 1997); and finally (e) R-type channels insensitive to organic compounds and blocked by  $\text{Ni}^{2+}$  (Zhang et al., 1993).

In contrast, few studies have been carried out on  $\text{Ca}^{2+}$  channels in invertebrate neurones. Both LVA and HVA  $\text{Ca}^{2+}$  current types have been identified in leech (Angstadt and Calabrese, 1991), snail (Haydon and Man-Son-Hing, 1988), *Aplysia californica* (Fossier et al., 1994), squid (Llinás et al., 1989) and crustacean neurones (Meyers et al., 1992; Onetti et al., 1990; Richmond et al., 1995, 1996). Recently, a P-type  $\text{Ca}^{2+}$  channel has been described in crayfish motoneurones (Hong and Lnenicka, 1997) that is less sensitive to  $\omega$ -agatoxin-IVA ( $600 \text{ nmol l}^{-1}$ ) than that in vertebrate neurones (Randall and Tsien, 1995).

Spontaneous neuronal firing in the X-organ sinus gland system is related to hormonal release (Stuenkel, 1985). Action potentials are  $\text{Ca}^{2+}$ -dependent (Iwasaki and Satow, 1971) and the intracellular free  $[\text{Ca}^{2+}]$  modulates  $\text{K}^+$  channels (Martínez et al., 1991) and the negative slope conductance (Onetti et al., 1990). In the present study, we characterize the biophysical and pharmacological properties of the  $\text{Ca}^{2+}$  current in freshly dissociated XO neurones of the crayfish *Procambarus clarkii* and demonstrate that it corresponds to an HVA P-type  $\text{Ca}^{2+}$  current.

## Materials and methods

### Dissection

*Procambarus clarkii* (Girard) were collected from Río Conchos, Chihuahua, México, and acclimated to laboratory conditions for 2 weeks under a 12 h:12 h L:D photoperiod. Eyestalks were excised and placed in chilled saline solution containing (in  $\text{mmol l}^{-1}$ ): 205 NaCl, 5.4 KCl, 2.6  $\text{MgCl}_2$ , 13.5  $\text{CaCl}_2$  and 10 Hepes, adjusted to pH 7.4 with NaOH. The exoskeleton, muscles and connective tissue were carefully removed under a dissecting microscope, and the neuronal somata were exposed. Isolated XOs were incubated with  $200 \mu\text{g ml}^{-1}$  collagenase-dispase (Boehringer Mannheim) for 1 h in modified Leibovitz L-15 culture medium containing (in  $\text{mmol l}^{-1}$ ): 205 NaCl, 5.4 KCl, 13.5  $\text{CaCl}_2$ , 2.5  $\text{MgCl}_2$ , 10 Hepes, 5.5 glucose, 2 L-glutamine, and gentamycin ( $16 \mu\text{g ml}^{-1}$ , Schering Plough), streptomycin ( $5 \mu\text{g ml}^{-1}$ , Sigma) and penicillin ( $5 \text{ units ml}^{-1}$ , Sigma). The enzyme was washed out, and the XO neurones were dissociated by gentle suction through fire-polished micropipettes (García et al., 1990). Isolated neurones were plated individually onto a  $200 \mu\text{l}$  recording chamber, precoated with Concanavalin A (Type III, Sigma). Cells were maintained at room temperature ( $22\text{--}24^\circ\text{C}$ ) in modified Leibovitz L-15 medium.

### Electrophysiology

Voltage-clamp experiments in the whole-cell configuration were performed using freshly dissociated XO neurones (2–6 h after plating). Recordings were made using an Axopatch-200A amplifier (Axon Instruments). Pipettes were constructed from borosilicate capillaries (Sutter Instruments) using a horizontal

puller (P-87 Flaming Brown, Sutter Instruments) and fire-polished with a microforge (Narishige MF-90), to a final resistance of  $2.5\text{--}4 \text{ M}\Omega$ . Pipettes were filled with a solution containing (in  $\text{mmol l}^{-1}$ ): 215 CsCl, 2.86  $\text{CaCl}_2$ , 2 Mg-ATP, 5.25 EGTA, 10 Hepes, adjusted to pH 7.4 with CsOH.  $\text{Ca}^{2+}$  currents were filtered at 5 kHz and acquired using commercially available hardware and software (Axon Instruments). Transient capacitative and leak currents were subtracted using the P/4 protocol (Almers et al., 1983), series resistance was generally compensated  $>70\%$ . X-organ neurones were continuously superfused with a solution containing (in  $\text{mmol l}^{-1}$ ): 195 N-methyl-D-glucamine chloride (NMG-Cl), 20 tetraethylammonium chloride (TEA-Cl), 13.5  $\text{CaCl}_2$  and 10 Hepes, adjusted to pH 7.4 with NMG<sup>+</sup>. During permeability experiments, extracellular  $\text{Ca}^{2+}$  was substituted equimolarly by  $\text{Ba}^{2+}$ ,  $\text{Sr}^{2+}$ ,  $\text{Mg}^{2+}$ ,  $\text{Mn}^{2+}$ ,  $\text{Cd}^{2+}$ ,  $\text{Ni}^{2+}$  or  $\text{Co}^{2+}$ ; in blocking experiments, the divalent cations ( $\text{Cd}^{2+}$ ,  $\text{Ni}^{2+}$ ,  $\text{Co}^{2+}$  and  $\text{Zn}^{2+}$ ) were added to the superfusing solution.

### Pharmacology

Stock solutions of DHPs (nifedipine, nitrendipine and Bay K-8644) were dissolved in 95% ethanol and stored in the dark at  $4^\circ\text{C}$ . The DHPs tested ( $2\text{--}20 \mu\text{mol l}^{-1}$ ) were protected from light during experiments. Peptide toxins (Alomone) were dissolved in dimethyl sulphoxide, and the concentrations tested were from  $50 \text{ nmol l}^{-1}$  to  $5 \mu\text{mol l}^{-1}$ . Organic blockers were superfused with a low- $[\text{Ca}^{2+}]$  solution containing (in  $\text{mol l}^{-1}$ ): 207 NMG-Cl, 20 TEA-Cl, 5  $\text{CaCl}_2$  and 10 Hepes (pH 7.4).

## Results

To characterize the properties of the  $\text{Ca}^{2+}$  current in freshly dissociated crayfish XO neurones, other membrane currents were minimized. The  $\text{Na}^+$  current was eliminated by replacing external  $\text{Na}^+$  with NMG<sup>+</sup>;  $\text{K}^+$  currents were blocked with TEA<sup>+</sup> ( $20 \text{ mmol l}^{-1}$ ) in the external solution and by substituting intracellular  $\text{K}^+$  with Cs<sup>+</sup>. Under these ionic conditions, membrane-depolarizing voltage pulses activated an inward current identified as a  $\text{Ca}^{2+}$  current.

### Steady-state voltage-dependent activation of the $\text{Ca}^{2+}$ current

Fig. 1A shows a set of recordings of inward  $\text{Ca}^{2+}$  currents in response to 10 mV depolarizing voltage steps from a holding potential of  $-70 \text{ mV}$ . The threshold for the activation of the  $\text{Ca}^{2+}$  current was approximately  $-40 \text{ mV}$  (Fig. 1A,B). Both the onset and decay of the  $\text{Ca}^{2+}$  current became faster as depolarization increased. The  $\text{Ca}^{2+}$  current reached its peak in approximately 2 ms at 20 mV. The current decayed in a time-dependent manner that reflected mainly inactivation of  $\text{Ca}^{2+}$  channels. The maximal  $\text{Ca}^{2+}$  current was evoked at potentials between 20 and 30 mV. The current–voltage ( $I$ – $V$ ) relationship (Fig. 1B) shows that depolarizations greater than 20 mV resulted in a progressive decrease in the amplitude of the  $\text{Ca}^{2+}$  current; the reversal potential was more positive than 80 mV.

To establish the presence of LVA  $\text{Ca}^{2+}$  currents in XO neurones, recordings were made from several cells at three

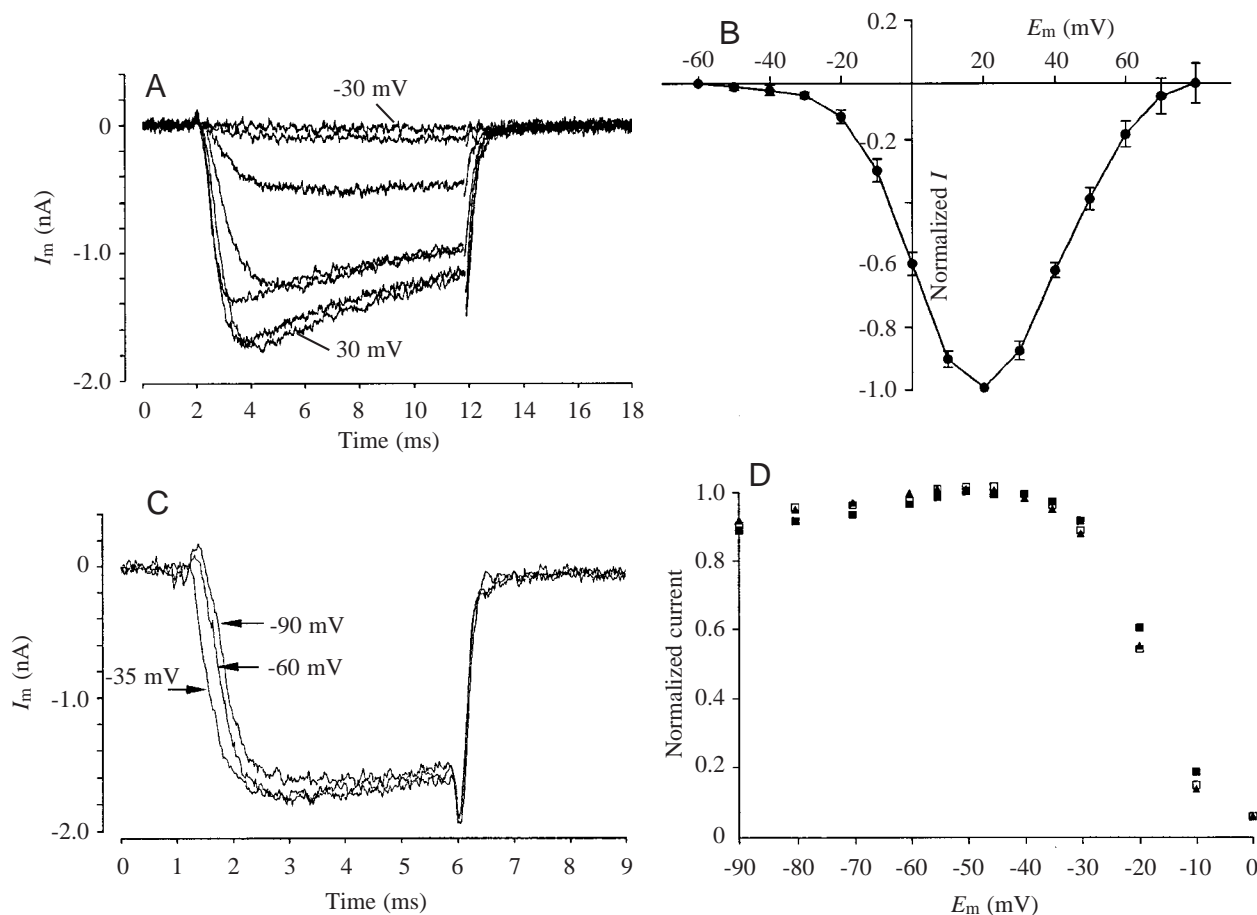

Fig. 1. Activation of the  $\text{Ca}^{2+}$  current in XO neurones. (A)  $\text{Ca}^{2+}$  current ( $I_m$ ) traces obtained in response to 10 ms depolarizing command pulses and steps of 10 mV, from  $-30$  to  $30$  mV. The holding potential was  $-70$  mV. (B) Normalized  $\text{Ca}^{2+}$  current ( $I$ ) amplitude as a function of membrane potential ( $E_m$ ) (mean  $\pm$  s.d.  $N=12$ ). (C) Typical  $\text{Ca}^{2+}$  current traces recorded from the same neurone in response to a step to  $30$  mV from the three holding potentials indicated. (D) Normalized  $\text{Ca}^{2+}$  current amplitude from three neurones plotted against a holding potential ranging from  $-90$  to  $0$  mV. The  $\text{Ca}^{2+}$  currents were evoked by depolarizing command pulses to  $30$  mV.

different holding potentials ranging from  $-90$  to  $-40$  mV. This manoeuvre is commonly used to remove the possible inactivation of such currents (Carbone and Lux, 1984; Kasai and Neher, 1992). The  $I$ - $V$  relationships obtained from these experiments had the same threshold potential and current amplitudes, they also peaked at the same voltage, and the reversal potential was the same (data not shown). No differences were observed in the time course of deactivation when the holding potential was changed (Fig. 1C). The slow activation of the  $\text{Ca}^{2+}$  current at hyperpolarized potentials ( $-90$  and  $-60$  mV) may be due to the gating current and is explained by a sequential model in which the channel passes through several closed states before the open state (Armstrong, 1981). To explore the voltage-dependent inactivation of the  $\text{Ca}^{2+}$  current, it was measured by maintaining the neurones for 15 s at a defined holding potential (from  $-90$  to  $0$  mV). A test pulse to  $30$  mV was then applied for 5 ms, and the membrane was again repolarized to the holding potential. The maximal amplitude was obtained at  $-50$  mV (Fig. 1D). At holding potentials between  $-90$  and  $-50$  mV, the  $\text{Ca}^{2+}$  current

amplitude showed a small reduction (10% at  $-90$  mV), probably due to a slow inactivation. The  $\text{Ca}^{2+}$  current amplitude was constant between  $-50$  and  $-35$  mV, whereas it was abruptly reduced between  $-30$  and  $0$  mV (Fig. 1D). All these results indicate that the  $\text{Ca}^{2+}$  current in crayfish XO neurones is generated by HVA  $\text{Ca}^{2+}$  channels.

#### Steady-state activation

Although P-type  $\text{Ca}^{2+}$  currents have been reported in invertebrate preparations (Llinás et al., 1989; Fossier et al., 1994; Hong and Lnenicka, 1997), no kinetic analysis of such currents has been performed in crustacean neurones. To characterize the biophysical properties of the  $\text{Ca}^{2+}$  current ( $I_{\text{Ca}}$ ) in the XO neurones, a kinetic analysis was performed according to the model of Hodgkin and Huxley (1952) for  $\text{Na}^+$  and  $\text{K}^+$  currents in squid axon:

$$I_{\text{Ca}}(V, t) = I_{\text{Ca,max}}(V)m^x(V, t), \quad (1)$$

where  $I_{\text{Ca,max}}(V)$  is the maximal  $\text{Ca}^{2+}$  current as a function of voltage ( $V$ ),  $x$  is a constant integer,  $t$  is time, and  $m(V, t)$  is a

continuous variable from 0 to 1. The term  $m^x(V, t)$  reflects the fraction of  $\text{Ca}^{2+}$  conductance as a function of voltage and time, and is described by:

$$\frac{dm(V, t)}{dt} = \alpha_m(1 - m) - \beta_m m = \frac{(m_\infty - m)}{\tau_m}, \quad (2)$$

where  $\alpha_m$  and  $\beta_m$  are the first-order rate constants governing the opening and closing of the channel, respectively,  $m_\infty = \alpha_m / [\alpha_m(V) + \beta_m(V)]$  is the steady-state value of  $m$ , and the time constant  $\tau_m = 1 / [\alpha_m(V) + \beta_m(V)]$ .

In the steady state, the fraction of  $\text{Ca}^{2+}$  conductance ( $m_\infty^x$ ) can be estimated by measuring the tail current amplitude on repolarization to  $-60$  mV after a 5 ms activating pulse. This time allowed full activation of the  $\text{Ca}^{2+}$  current, with minimal contamination by other currents. The steady-state activation curve has a sigmoidal form (Fig. 2A) and was fitted by the Boltzmann expression:

$$m_\infty^x(V) = 1 / \{1 + e^{[(V_{1/2} - V)/V_K]}\}^x, \quad (3)$$

where the mid-point voltage ( $V_{1/2}$ ) was  $-7.45$  mV, the steepness factor ( $V_K$ ) was  $12.04$  mV and  $x=2$ .

#### Open-channel current–voltage relationship

To determine the membrane permeability to  $\text{Ca}^{2+}$ , the instantaneous  $I$ – $V$  relationship was constructed by measuring

the tail current amplitudes at various return potentials (from  $-60$  to  $0$  mV) after activating a constant number of  $\text{Ca}^{2+}$  channels at  $60$  mV from a holding potential of  $-70$  mV. The pulse protocol is illustrated in the Fig. 2B. For voltages higher than  $0$  mV, the current amplitudes obtained from the  $I$ – $V$  curves were scaled by matching to the tail current amplitude at  $0$  mV. The averaged instantaneous  $I$ – $V$  relationship (Fig. 2C) showed that, even at potentials up to  $80$  mV, outward currents were not detected. The strong rectification of the instantaneous  $I$ – $V$  relationship at positive potentials is expected for a highly asymmetric distribution of calcium ions. The continuous line corresponds to the Goldman–Hodgkin–Katz constant-field equation (Goldman, 1943; Hodgkin and Katz, 1949), assuming a single permeant ion:

$$I_{\text{Ca}} = P_{\text{Ca}} \frac{z^2 V F^2}{RT} \frac{a_i - a_o e^{-zV/RT}}{1 - e^{-zV/RT}}, \quad (4)$$

where  $a_o$  and  $a_i$  are the activities of  $\text{Ca}^{2+}$  outside and inside the cell,  $P_{\text{Ca}}$  is the permeability of  $\text{Ca}^{2+}$ ,  $z$  is the valence,  $V$  is the membrane potential,  $F$  is Faraday's constant,  $R$  is the gas constant and  $T$  is absolute temperature. The activities of  $\text{Ca}^{2+}$  were replaced by their concentrations ( $5 \text{ mmol l}^{-1}$   $\text{Ca}^{2+}$  outside and  $10 \text{ nmol l}^{-1}$   $\text{Ca}^{2+}$  inside). The permeation parameter was adjusted to fit the results in Fig. 2C, giving a value of  $4.95 \times 10^{-5} \text{ cm s}^{-1}$ .

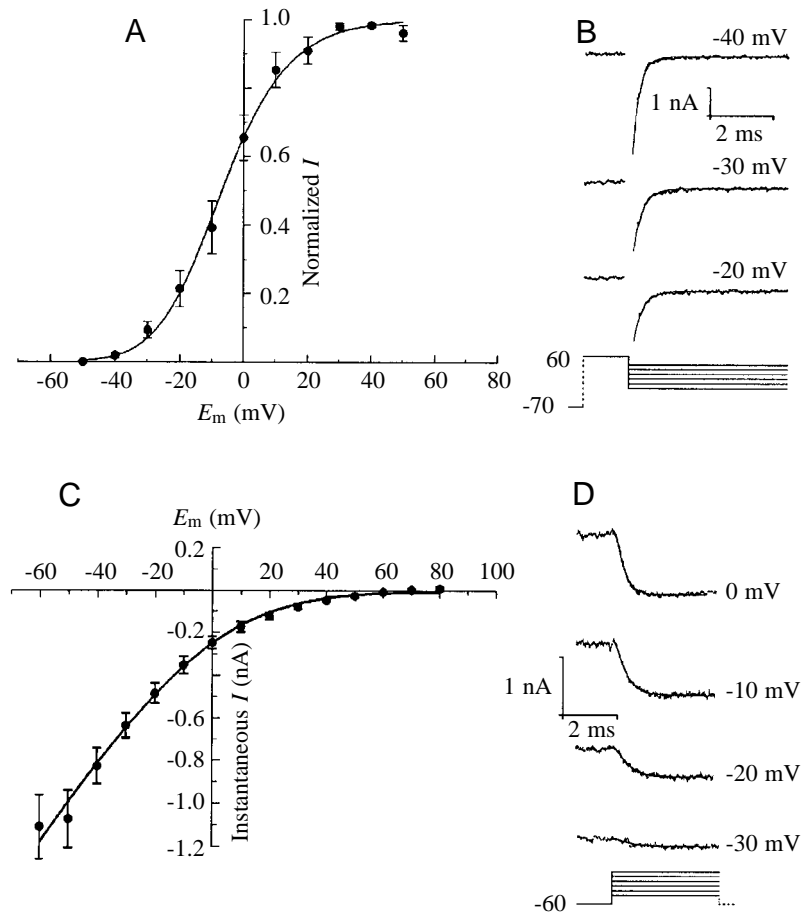

Fig. 2. Steady-state activation and instantaneous current–voltage relationship of the  $\text{Ca}^{2+}$  current. (A) Averaged steady-state activation curve fitted with the Boltzmann equation (equation 3; see text). Mean  $\pm$  s.d. from five neurones. (B) Tail  $\text{Ca}^{2+}$  currents obtained from a holding potential of  $-70$  mV in response to the depolarizing pulses indicated. The traces were fitted with a first-order exponential function. (C) Averaged instantaneous current–voltage relationship from five neurones, fitted with the constant-field equation (equation 4; see text). (D) Onset of the  $\text{Ca}^{2+}$  current obtained from a holding potential of  $-60$  mV in response to depolarizing command pulses at the values indicated. The superimposed traces were fitted with equation 5 (see text).  $E_m$ , membrane potential;  $I$ , current.

*Activation and inactivation kinetics*

The activation of the Ca<sup>2+</sup> current followed a sigmoidal time course with a variable delay in response to depolarizing pulses (Fig. 2D). The contributions of gating currents, which dominate the earlier part of the activation, were minimized by subtracting the corresponding responses in the presence of 1 mmol l<sup>-1</sup> Cd<sup>2+</sup>.

The turn-on kinetics of the Ca<sup>2+</sup> current, in response to a voltage step, was described by the solution of equation 2:

$$m^x(V, t) = [m_\infty - (m_\infty - m_0)e^{-t/\tau_m(V)}]^x, \quad (5)$$

where  $m_0$  is the value of  $m$  at time zero. The currents evoked by voltage steps were fitted by varying  $x$  from 1 to 4 and over the range -40 to 40 mV. The expression that best fitted the activation time course of Ca<sup>2+</sup> currents, at different test potentials, took the  $m^2$  form (Fig. 2D). The time constants ( $\tau_m$ ) obtained using this method were dependent on the test potential and had a maximum value at approximately -20 mV (Fig. 3A).

According to  $m^2$  kinetics, equation 5 implies that the tail current should decay with a single-exponential time course, having a time constant of  $0.5\tau_m$ , for holding potentials where the steady-state value of  $m$  is zero. The time course of the tail current evoked under these conditions was used to estimate the voltage-dependence of  $\tau_m$  for voltages below -20 mV (Fig. 3A). At more positive potentials, tails could also be fitted by a single-exponential function with a time constant ( $\tau_f$ ) using the expression derived by Hagiwara and Ohmori (1982):

$$\tau_f \approx \tau_m(m_\infty + m_0)/2m_0. \quad (6)$$

Thus, the values of  $\tau_m$  can be derived from those of  $\tau_f$ , and the calculated time constants are consistent with the model derived from the turn-on kinetics, suggesting that the derived kinetic model can account for both the activation and deactivation kinetics. The activation time constants,  $\tau_m$ , estimated from activation and deactivation measurements, show a bell-shaped dependence on membrane potential (Fig. 3A), as expected for a voltage-gated channel.

The rate constants  $\alpha_m$  and  $\beta_m$  were then derived from the measured values of  $m_\infty$  and  $\tau_m$  using equations 2 and 5. The rate constants as a function membrane potential (Fig. 3B) were fitted by:

$$\alpha_m(V) = 0.087(-24.72 - V)/[1 - e^{-(24.72-V)/7.74}], \quad (7)$$

$$\beta_m(V) = 0.282(V + 68.93)/[1 - e^{(V+68.93)/17.78}], \quad (8)$$

where  $\alpha_m$  and  $\beta_m$  are in ms<sup>-1</sup> and  $V$  is the membrane potential in mV.

*Ca<sup>2+</sup>-dependent inactivation*

In voltage-clamped crustacean neurones, as in other preparations, Ca<sup>2+</sup> currents evoked by depolarizing pulses gradually decay from an initial peak as a result of Ca<sup>2+</sup> channel inactivation (Hagiwara and Byerly, 1981; Richmond et al., 1995; Branchaw et al., 1997). The extent of inactivation was manifested by a decrease of the tail current amplitude on repolarization following command pulses of various durations

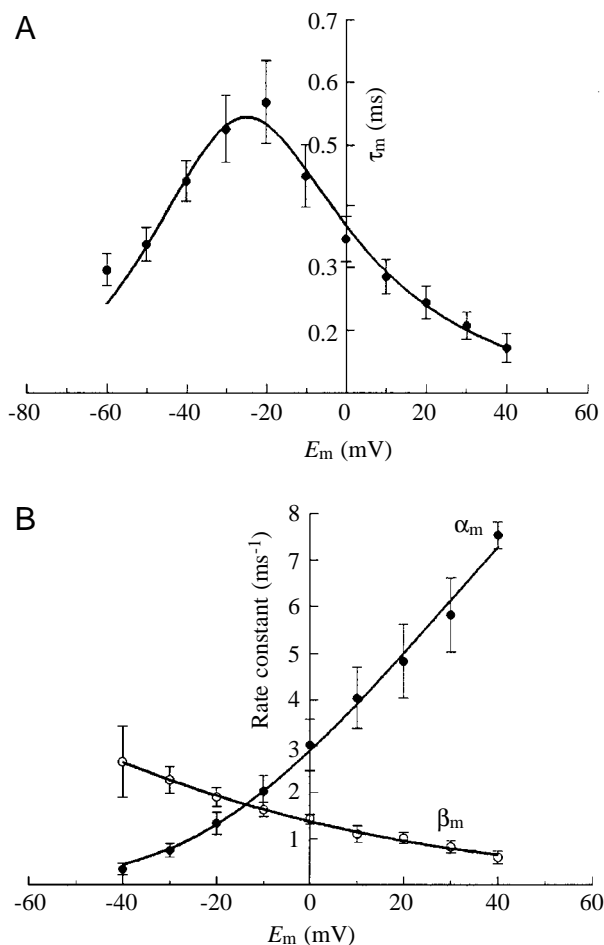

Fig. 3. Activation kinetics of the Ca<sup>2+</sup> current in XO neurones. (A) The time constant of activation for the  $m^2$  model as a function of voltage derived from the turn-on and turn-off of the Ca<sup>2+</sup> currents (mean  $\pm$  s.d.  $N=5$ ). The time constants from tail currents were obtained by fitting a first-order exponential function. The solid line is given by  $\tau_m=1/[\alpha_m(V)+\beta_m(V)]$ . (B) Rate constants of activation for the  $m^2$  model.  $\alpha_m$  (filled circles) and  $\beta_m$  (open circles) as a function of membrane potential ( $E_m$ ). Data were calculated from equation 2, using the steady-state activation curve (Fig. 2A) and the time constant data from A. The solid lines are given by equations 7 and 8.  $\tau_m$ , time constant;  $\alpha_m$ ,  $\beta_m$ , rate constants. See text for further explanation.

(Fig. 4A), which bears a close relationship with the time course of decay of the Ca<sup>2+</sup> current.

Moreover, the time course of the decay of the Ca<sup>2+</sup> current depends on the cation that carries the current. Fig. 4B shows three representative recordings obtained from the same neurone, in which the inward current was carried by Ca<sup>2+</sup>, Sr<sup>2+</sup> or Ba<sup>2+</sup>. When the current was carried by Ba<sup>2+</sup>, it did not decay during the command pulse, while the Sr<sup>2+</sup> current decayed more slowly than the Ca<sup>2+</sup> current, suggesting that Sr<sup>2+</sup> partially inactivated Ca<sup>2+</sup> channels. These findings strongly support the idea that the inactivation of the Ca<sup>2+</sup> current in XO neurones is mediated by Ca<sup>2+</sup>.

To study the Ca<sup>2+</sup>-dependent inactivation in more detail, the

relationship between  $\text{Ca}^{2+}$  entry and  $\text{Ca}^{2+}$  current inactivation was explored using a double-pulse protocol in which the potential of the prepulse varied from  $-60$  to  $110$  mV and its effects on a fixed test pulse to  $30$  mV was evaluated (Fig. 4Ci). Representative traces obtained at prepulse values of  $0$ ,  $30$  and  $60$  mV are illustrated in the Fig. 4Cii ( $0$  mV at the top,  $60$  mV at the bottom). The  $I$ - $V$  relationship obtained with the  $\text{Ca}^{2+}$  current evoked by the prepulse is illustrated in Fig. 4Ciii, and the inactivation curve (Fig. 4Civ) was obtained by plotting the  $\text{Ca}^{2+}$  current amplitude evoked by the test pulse as a function of prepulse potential. At the prepulse potential at which  $\text{Ca}^{2+}$  entry was maximal ( $30$  mV), the inactivation of the  $\text{Ca}^{2+}$  current was also maximal ( $35\%$ ). These results indicate that the time-dependent inactivation of the  $\text{Ca}^{2+}$  current in XO neurones is dependent on the entry of  $\text{Ca}^{2+}$ .

Recovery from inactivation is another mechanism that can be influenced by intracellular  $\text{Ca}^{2+}$  concentration (Gutnick et al., 1989). To study this process, we evoked the  $\text{Ca}^{2+}$  current

with prepulses to  $30$  mV, and after a variable interval at the holding potential ( $-50$  mV) a test pulse with the same characteristics was applied. Short prepulses ( $10$  ms) had less effect on the  $\text{Ca}^{2+}$  current amplitude evoked by the test pulse, reducing it by  $25\%$  when the interpulse interval was  $5$  ms. A longer ( $20$  ms) prepulse reduced the current amplitude evoked by the second pulse at the same interpulse interval by  $40\%$  (Fig. 4Di,ii). The time courses of the recovery were fitted with single-exponential curves; the time constants were  $17 \pm 2.6$  for a  $10$  ms prepulse and  $31 \pm 3.2$  ms for a  $20$  ms prepulses (means  $\pm$  S.E.M.,  $N=4$ ) (Fig. 4Diii). These results suggest that recovery from the inactivation of the  $\text{Ca}^{2+}$  current in XO neurones is dependent on the intracellular free  $\text{Ca}^{2+}$  concentration. Similar results have been reported in neurohypophysis terminals where two mechanisms of  $\text{Ca}^{2+}$  channel inactivation are implicated, one depending on voltage and the other depending on the intracellular free  $\text{Ca}^{2+}$  concentration (Branchaw et al., 1997).

Fig. 4.  $\text{Ca}^{2+}$ -dependent inactivation and recovery from inactivation of the  $\text{Ca}^{2+}$  current. (A) Superimposed  $\text{Ca}^{2+}$  current ( $I_m$ ) traces recorded from a holding potential of  $-50$  mV in response to a command pulse to  $20$  mV. The duration of the command pulse was increased progressively in steps of  $1$  ms. (B) Recordings of  $\text{Ca}^{2+}$ ,  $\text{Sr}^{2+}$  and  $\text{Ba}^{2+}$  currents obtained from the same neurone in response to  $50$  ms depolarizations to  $20$  mV from a holding potential of  $-60$  mV. The time course of the current decay depended on the divalent cation that carried the current. (C) (i) Double-pulse protocol. Depolarizing prepulses in steps of  $10$  mV were applied for  $50$  ms from a holding potential of  $-50$  mV. The membrane was repolarized to the same holding potential for  $50$  ms, and a test pulse to  $30$  mV was then applied for  $50$  ms. (ii)  $\text{Ca}^{2+}$  current traces that correspond to prepulse values of  $0$ ,  $30$  and  $60$  mV (from top to bottom). (iii) Normalized current-voltage relationship obtained from the  $\text{Ca}^{2+}$  current amplitude evoked by the prepulse.  $I$ , normalized current. (iv) Inactivation curve, the  $\text{Ca}^{2+}$  current amplitude evoked by the test pulse as a function of the prepulse potential. Current amplitudes were normalized with respect to that evoked in the absence of a prepulse ( $E_h$ ). (D) The recovery from the inactivation of the  $\text{Ca}^{2+}$  current depends on previous  $\text{Ca}^{2+}$  entry. (i)  $\text{Ca}^{2+}$  current recordings evoked by pairs of depolarizing pulses to  $30$  mV for  $10$  ms from a holding potential of  $-50$  mV and separated by variable intervals. (ii) Same protocol as in i, but the duration of the pulses was  $20$  ms. (iii) The relative current amplitude evoked by the test pulse versus the interpulse interval.  $E_m$ , membrane potential.

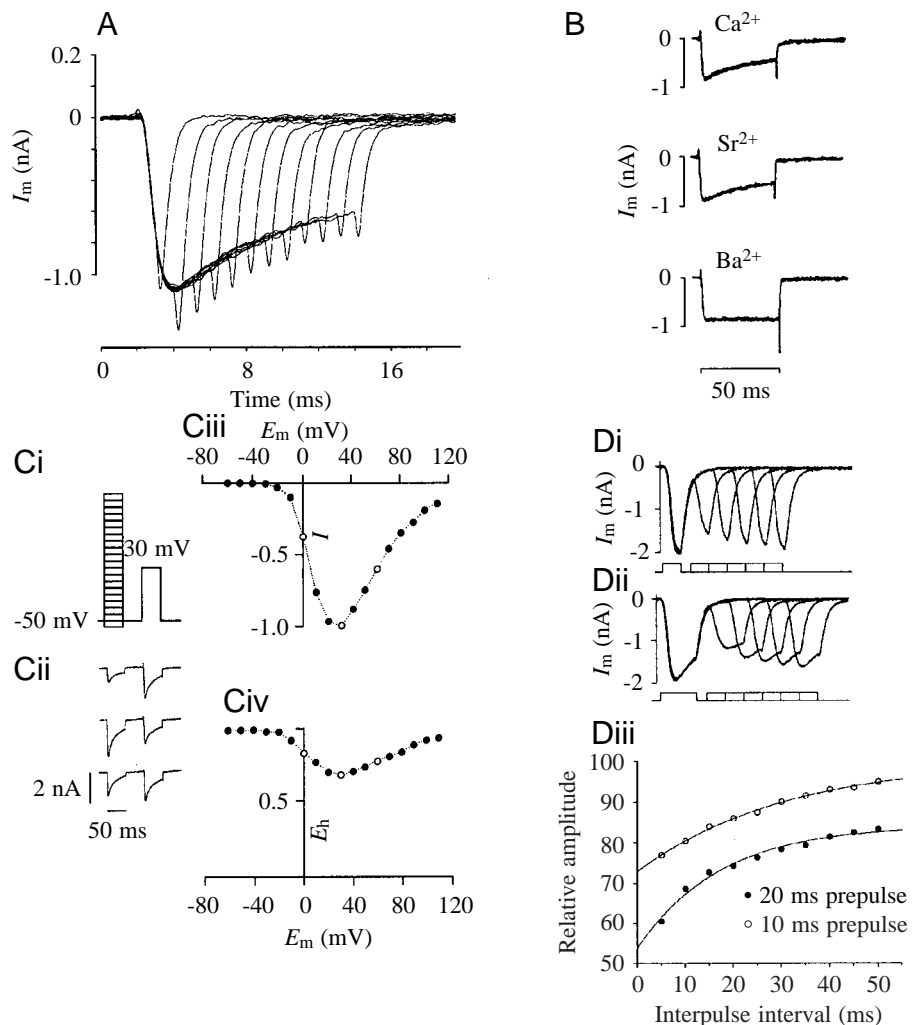



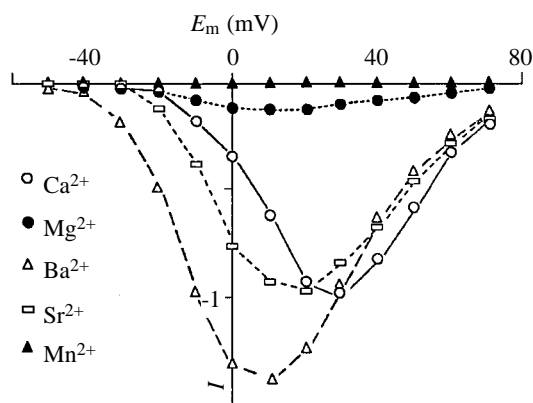

Fig. 5. Divalent cation permeation through  $\text{Ca}^{2+}$  channels in XO neurones. Typical current–voltage ( $I$ – $V$ ) relationships for different divalent cation currents normalized with respect to the maximal  $\text{Ca}^{2+}$  current (see text). The concentration of each cation was  $13.5 \text{ mmol l}^{-1}$ . All the  $I$ – $V$  relationships were obtained from the same neurone, from a holding potential of  $-50 \text{ mV}$  and with  $10 \text{ ms}$  depolarizing command pulses.  $E_m$ , membrane potential.

#### Selectivity and blockage by divalent cations

To explore the selectivity sequence of divalent cations through  $\text{Ca}^{2+}$  channels in XO neurones, extracellular  $\text{Ca}^{2+}$  ( $13.5 \text{ mmol l}^{-1}$ ) was equimolarly replaced by  $\text{Ba}^{2+}$ ,  $\text{Sr}^{2+}$ ,  $\text{Mg}^{2+}$ ,  $\text{Mn}^{2+}$ ,  $\text{Co}^{2+}$ ,  $\text{Ni}^{2+}$  or  $\text{Cd}^{2+}$ . In a series of experiments,  $I$ – $V$  relationships were obtained from a holding potential of  $-60 \text{ mV}$  with  $50 \text{ ms}$  depolarizing pulses at  $10 \text{ mV}$  intervals.  $\text{Ba}^{2+}$ ,  $\text{Sr}^{2+}$  and  $\text{Mg}^{2+}$  were able to generate currents, but  $\text{Mn}^{2+}$ ,  $\text{Co}^{2+}$ ,  $\text{Ni}^{2+}$  and  $\text{Cd}^{2+}$  failed to generate currents (Fig. 5; results for  $\text{Co}^{2+}$ ,  $\text{Ni}^{2+}$  and  $\text{Cd}^{2+}$  not shown). The selectivity sequence for permeable divalent cations was 1.4 ( $\text{Ba}^{2+}$ ), 1.0 ( $\text{Sr}^{2+}$ ) and 0.2 ( $\text{Mg}^{2+}$ ). These values were obtained by normalizing the current carried by any one of the divalent cations with respect to the maximal  $\text{Ca}^{2+}$  current. The activation threshold of  $\text{Ba}^{2+}$  and  $\text{Sr}^{2+}$  currents was shifted in the hyperpolarizing direction by  $20 \text{ mV}$ , and the maximum current values were shifted in the hyperpolarizing direction by  $10 \text{ V}$ , in comparison with the activation threshold of the  $\text{Ca}^{2+}$  current.

Blocking of the  $\text{Ca}^{2+}$  current in XO neurones by divalent cations was explored by superfusing  $\text{Co}^{2+}$ ,  $\text{Ni}^{2+}$ ,  $\text{Cd}^{2+}$  or  $\text{Zn}^{2+}$ , at low concentrations, in the presence of the normal  $\text{Ca}^{2+}$  concentration.  $\text{Ca}^{2+}$  currents were recorded first in the absence and then in the presence of the blocking ion, from a holding potential of  $-50 \text{ mV}$  with  $10 \text{ mV}$  depolarizing steps for  $50 \text{ ms}$ . The  $\text{Ca}^{2+}$  current was more effectively blocked by  $\text{Cd}^{2+}$  and  $\text{Zn}^{2+}$  than by  $\text{Co}^{2+}$  and  $\text{Ni}^{2+}$  (Fig. 6A). The maximal blocking effect on the  $\text{Ca}^{2+}$  current of  $\text{Zn}^{2+}$  or  $\text{Cd}^{2+}$  ( $100 \mu\text{mol l}^{-1}$ ) averaged  $80 \%$ , and the effects were partially reversible. Blockage by  $\text{Ni}^{2+}$  or  $\text{Co}^{2+}$  ( $2 \text{ mmol l}^{-1}$ ) was less effective ( $40 \%$ ). Furthermore, the block caused by  $\text{Co}^{2+}$  and  $\text{Cd}^{2+}$  was less potent at negative potentials, whereas the opposite was true for  $\text{Ni}^{2+}$  and  $\text{Zn}^{2+}$  (Fig. 6B), suggesting a voltage-dependent mechanism.

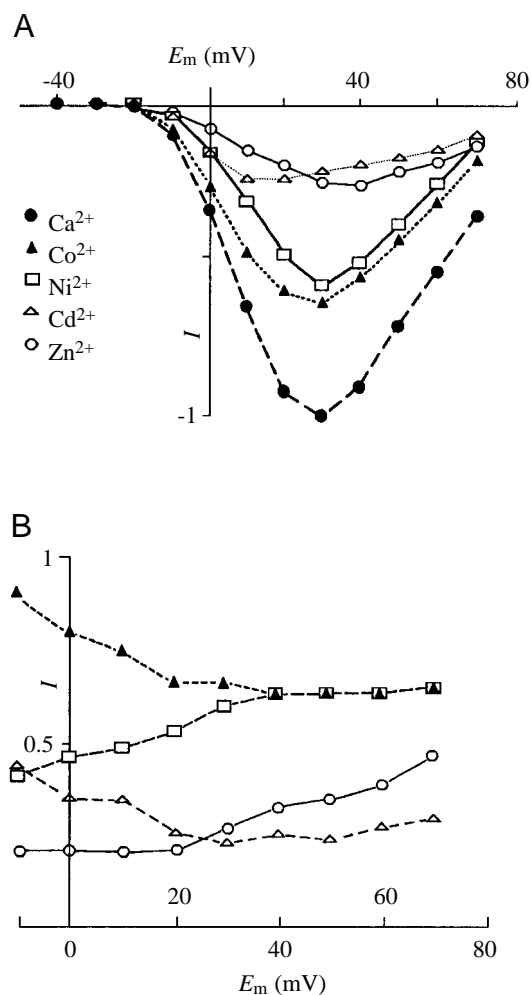

Fig. 6. Blockage of the  $\text{Ca}^{2+}$  current by divalent cations. (A) Representative current–voltage ( $I$ – $V$ ) curves normalized to the averaged  $I$ – $V$  relationship of the control  $\text{Ca}^{2+}$  current. After obtaining the control  $I$ – $V$  curve,  $\text{Co}^{2+}$  ( $2 \text{ mmol l}^{-1}$ ),  $\text{Ni}^{2+}$  ( $2 \text{ mmol l}^{-1}$ ),  $\text{Cd}^{2+}$  ( $100 \mu\text{mol l}^{-1}$ ) or  $\text{Zn}^{2+}$  ( $100 \mu\text{mol l}^{-1}$ ) was added to the external solution. The reduction in the amplitude of the  $\text{Ca}^{2+}$  current shows the extent of blockage produced by these cations. Depolarizing pulses ( $10 \text{ mV}$ ,  $10 \text{ ms}$ ) were applied from a holding potential of  $-50 \text{ mV}$ . (B) The resistant fraction of the  $\text{Ca}^{2+}$  current plotted against the membrane potential ( $E_m$ ) (data from A). The blockage of the  $\text{Ca}^{2+}$  current exerted by these cations was voltage-dependent.

#### Pharmacology

To explore the pharmacological properties of the  $\text{Ca}^{2+}$  current and to identify the possible multiple components of HVA  $\text{Ca}^{2+}$  channels involved in generating the  $\text{Ca}^{2+}$  current, we performed a series of experiments in which we applied several derivatives of DHPs, such as nitrendipine, nifedipine, nimodipine or Bay K-8644, as well as derivatives of phenylalkylamines, such as verapamil or D-600. None of these compounds, applied extracellularly at concentrations up to  $20 \mu\text{mol l}^{-1}$ , affected the  $\text{Ca}^{2+}$  current.

The  $\text{Ca}^{2+}$  current was blocked by the P-type  $\text{Ca}^{2+}$ -channel-selective peptide  $\omega$ -agatoxin-IVA at a low extracellular  $\text{Ca}^{2+}$  concentration ( $5 \text{ mmol l}^{-1}$ ). Fig. 7A illustrates the effect of

200 nmol l<sup>-1</sup>  $\omega$ -agatoxin-IVA on the amplitude of the Ca<sup>2+</sup> current. In three neurones, the Ca<sup>2+</sup> current amplitude was rapidly reduced by 85% by the toxin to reach a maximal level of block at approximately 1 min; the block persisted after the peptide had been washed out. However, when two or three trains of depolarizing pulses (2 ms) to 60 mV at 5 Hz were applied for 5 s, after the maximal effect of the toxin, the blockage was partially removed, 80% of the Ca<sup>2+</sup> current amplitude being recovered (Fig. 7A), suggesting that the effects exerted by the toxin are voltage-dependent, as has been reported previously in vertebrate neurones (Mintz et al., 1992). The degree of block was dependent on the toxin concentration, 50 and 100 nmol l<sup>-1</sup> reduced the Ca<sup>2+</sup> current amplitude by 10 and 35%, respectively. In contrast, at the normal extracellular Ca<sup>2+</sup> concentration, the peptide was ineffective in blocking the current at concentrations up to 500 nmol l<sup>-1</sup>. Other peptide toxins specific for N-type ( $\omega$ -conotoxin-GVIA, 2  $\mu$ mol l<sup>-1</sup>) and Q-type ( $\omega$ -conotoxin-MVIIC, 5  $\mu$ mol l<sup>-1</sup>) Ca<sup>2+</sup> channels had no effect on the Ca<sup>2+</sup> current in XO neurones (Fig. 7B,C).

Finally, when the fraction of Ca<sup>2+</sup> current resistant to  $\omega$ -agatoxin-IVA (Fig. 8A) was scaled up to match the control recording, we observed that the kinetics of activation and

deactivation were the same (Fig. 8C). The transient outward current at the beginning of the pulse (gating current) was not affected by the toxin. Furthermore, the residual Ca<sup>2+</sup> current showed an *I-V* relationship with the same characteristics as the control Ca<sup>2+</sup> current: the same threshold for activation and a maximum value at 20 mV (Fig. 8B). These results suggest that crayfish XO neurones express a single class of P-type Ca<sup>2+</sup> channels.

### Discussion

When the Ca<sup>2+</sup> current is activated, other physiological events such as action potentials occur, with the entry of Ca<sup>2+</sup> participating in the firing pattern (Meyers et al., 1992). This phenomenon is probably important in neurosecretory cells, since during normal electrical activity Ca<sup>2+</sup> channels are activated and allow the influx of Ca<sup>2+</sup>, a process crucial for cellular functions such as the inactivation of the Ca<sup>2+</sup> channels themselves, the modulation of K<sup>+</sup> channels (Martínez et al., 1991; Onetti et al., 1996), participation in the negative slope

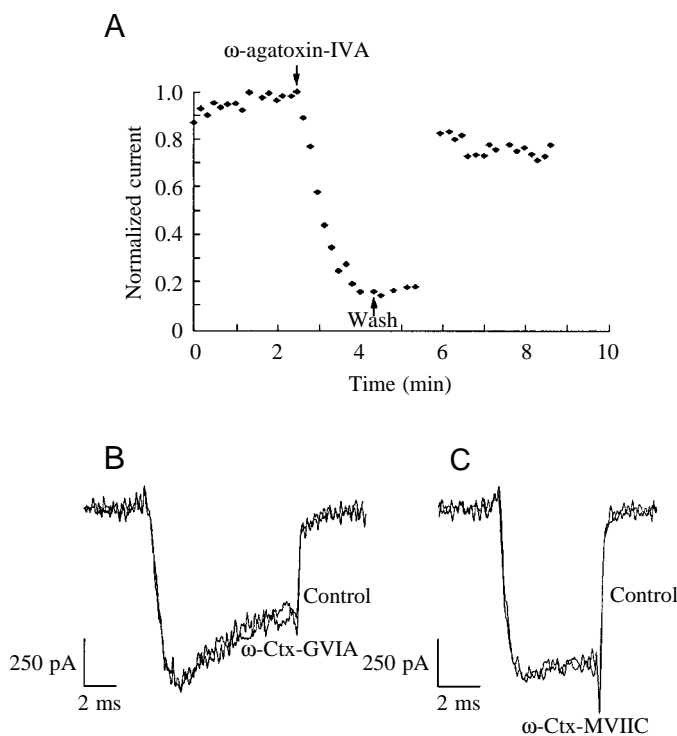

Fig. 7. Pharmacological features of the Ca<sup>2+</sup> current in crayfish XO neurones. (A) Plot of the Ca<sup>2+</sup> current amplitude against time. Ca<sup>2+</sup> currents were evoked by depolarizing command pulses to 30 mV for 5 ms, from a holding potential of -50 mV at a frequency of 0.1 Hz. When the current amplitude was stable, the toxin was superfused; its application (at 200 nmol l<sup>-1</sup>) and removal are indicated by arrows. (B,C) Superimposed Ca<sup>2+</sup> current traces obtained before and after the application of 2  $\mu$ mol l<sup>-1</sup>  $\omega$ -conotoxin-GVIA ( $\omega$ -Ctx-GVIA) or 5  $\mu$ mol l<sup>-1</sup>  $\omega$ -conotoxin-VIIC ( $\omega$ -Ctx-VIIC). These peptide toxins did not modify the amplitude or the time course of the Ca<sup>2+</sup> current.

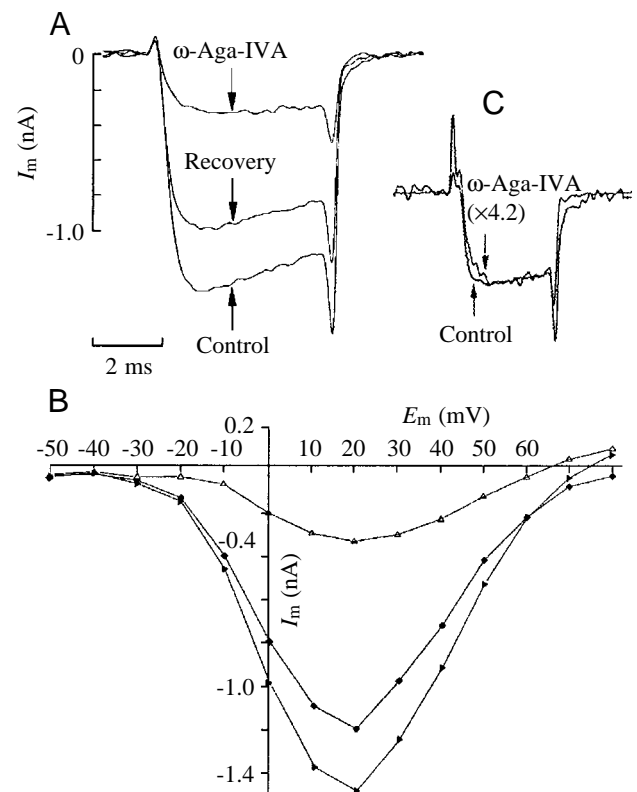

Fig. 8. Effects of 200 nmol l<sup>-1</sup>  $\omega$ -agatoxin-IVA ( $\omega$ -Aga-IVA) on the Ca<sup>2+</sup> current. (A) Ca<sup>2+</sup> current ( $I_m$ ) traces obtained before, during and after toxin application. The command pulse protocol was the same as in Fig. 7. (B) Current-voltage (*I-V*) relationships obtained from the same neurone, before (filled triangles), during (open triangles) and after (filled diamonds) the application of toxin. The experimental protocol was the same as in Fig. 6. (C) The current resistant to the toxin was scaled up ( $\times 4.2$ ) to compare its shape with that of the control current.



conductance (Onetti et al., 1990) and neuropeptide secretion (Renaud, 1988; Wang et al., 1997).

LVA  $\text{Ca}^{2+}$  currents seem to be absent in crayfish XO neurones because (a) the inactivation and deactivation kinetics of the  $\text{Ca}^{2+}$  current could be fitted to single-exponential functions, (b) the  $I$ - $V$  relationship did not have an additional peak at hyperpolarized potentials values and (c) the  $\text{Ca}^{2+}$  tail current amplitude did not change when it was evoked from different holding potentials (see Fig. 1C). Similar results have been reported in XO neurones from the crab *Cardisoma carnifex* (Richmond et al., 1995).

Activation of the  $\text{Ca}^{2+}$  current has been described in a variety of preparations using the Hodgkin and Huxley model ( $m^x$ ), in which the exponent  $x$  accounts for the speed of the activation (Adams and Gage, 1979; Llinás et al., 1981; Sala, 1991). In the present study, the onset of the  $\text{Ca}^{2+}$  current clearly follows the predicted kinetics at all the potentials tested. Additionally, the tail current data are consistent with the kinetics, implying a linear sequential model with two closed states and one open state. The  $\text{Ca}^{2+}$  current in XO neurones activates in a similar manner to that in pituitary cells (Hagiwara and Ohmori, 1982) and in sympathetic and hippocampal neurones (Belluzzi and Sacchi, 1989; Kay and Wong, 1987; Sala, 1991). According to the model, the predicted mean open time of the  $\text{Ca}^{2+}$  channel at  $-20$  mV would be  $568 \mu\text{s}$ , a value faster than that in sympathetic neurones (Sala, 1991) and in chromaffin cells (Fenwick et al., 1982).

The small reduction of the  $\text{Ca}^{2+}$  current amplitude evoked from holding potentials between  $-90$  and  $-35$  mV does not appear to be due to inactivation, because tail current amplitudes and their time courses were identical for three different holding potentials (Fig. 1C), indicating that the number of channels that remained open at the time of repolarization was the same in the three cases. An explanation for this reduction may be the presence of an outward gating current superimposed on  $\text{Ca}^{2+}$  current activation, the presence of another type of  $\text{Ca}^{2+}$  channel that inactivates slightly in this voltage range or a very slow inactivation of the  $\text{Ca}^{2+}$  channels. To differentiate between these, it will be necessary to explore this process in more detail.

The time-dependent decay of the  $\text{Ca}^{2+}$  current during depolarizing command pulses could be due to (a) depletion of extracellular  $\text{Ca}^{2+}$ , (b) contamination with outward currents, or (c) inactivation of  $\text{Ca}^{2+}$  channels. The first two possibilities were rejected because no effects were observed on the time course of the  $\text{Ca}^{2+}$  current when the cells were continuously superfused with a solution containing  $13.5 \text{ mmol l}^{-1}$   $\text{Ca}^{2+}$  or when  $\text{Cl}^-$  was replaced with  $\text{CH}_3\text{SO}_4^-$  or  $\text{Cs}^+$  was replaced with  $\text{TMA}^+$ . The decay of the  $\text{Ca}^{2+}$  current in XO neurones is therefore probably due to the inactivation of  $\text{Ca}^{2+}$  channels. At least two mechanisms have been described for inactivating the  $\text{Ca}^{2+}$  current, one that depends on membrane potential and another that depends on  $[\text{Ca}^{2+}]_i$  (Chad and Eckert, 1984). An increase in intracellular free  $\text{Ca}^{2+}$  concentration favours the inactivation of  $\text{Ca}^{2+}$  channels in a variety of preparations

(Ashcroft and Stanfield, 1982; Gutnick et al., 1989; Plant et al., 1983). It appears that the mechanism of inactivation of the  $\text{Ca}^{2+}$  current in XO neurones is mediated mainly by  $\text{Ca}^{2+}$ . This is supported by the observation that the current carried by  $\text{Ba}^{2+}$  did not decay, at least during the 50 ms command pulses, and that the amplitude of the  $\text{Ca}^{2+}$  current depended on previous influx of  $\text{Ca}^{2+}$ , as in other crustacean peptidergic neurones (Meyers et al., 1992; Richmond et al., 1995). The U-shaped curve obtained from a double-pulse protocol (Fig. 4Civ) is a hallmark of  $\text{Ca}^{2+}$ -dependent inactivation (Chad and Eckert, 1984) and is due to accumulation of  $\text{Ca}^{2+}$  in a submembrane compartment, probably binding to the open  $\text{Ca}^{2+}$  channels.

In a variety of cells,  $\text{Ba}^{2+}$  is more effective as a charge carrier than  $\text{Ca}^{2+}$ , probably because of its lower affinity for the channel (Hagiwara and Byerly, 1981). On the basis of the peak current for the  $I$ - $V$  relationships with different divalent cations, the selectivity sequence in crayfish XO neurones was:  $\text{Ba}^{2+} > \text{Sr}^{2+} \approx \text{Ca}^{2+} \gg \text{Mg}^{2+}$ , in comparison with crab peptidergic neurones, in which the reported sequence was  $\text{Ba}^{2+} > \text{Sr}^{2+} > \text{Ca}^{2+}$  (Richmond et al., 1995). The shift of the  $I$ - $V$  relationship of the  $\text{Ba}^{2+}$  current may be explained because  $\text{Ba}^{2+}$  is less effective than  $\text{Ca}^{2+}$  in shielding the membrane charge (Frankenhaeuser and Hodgkin, 1957). Other divalent cations that act as  $\text{Ca}^{2+}$  channel blockers ( $\text{Mn}^{2+}$ ,  $\text{Co}^{2+}$ ,  $\text{Ni}^{2+}$  and  $\text{Cd}^{2+}$ ) can also carry inward current through  $\text{Ca}^{2+}$  channels (for a review, see Hagiwara and Byerly, 1981). However, in crayfish XO neurones, we found that these cations did not generate currents, as they do in other crustacean neurones (Meyers et al., 1992; Richmond et al., 1995).

Blockage of the  $\text{Ca}^{2+}$  current in XO neurones by the divalent cations tested here depended on their concentration and on the membrane potential. We found that  $\text{Cd}^{2+}$  and  $\text{Zn}^{2+}$  were more effective in blocking the  $\text{Ca}^{2+}$  current than  $\text{Co}^{2+}$  and  $\text{Ni}^{2+}$ , suggesting that they have a higher affinity for the  $\text{Ca}^{2+}$  channel than do  $\text{Co}^{2+}$  and  $\text{Ni}^{2+}$ . In contrast,  $\text{Ni}^{2+}$  and  $\text{Zn}^{2+}$  blocked the  $\text{Ca}^{2+}$  current more effectively at hyperpolarized values ( $-10$  to  $50$  mV), whereas block of the  $\text{Ca}^{2+}$  current by  $\text{Co}^{2+}$  and  $\text{Cd}^{2+}$  was more effective at depolarizing potentials ( $30$ – $70$  mV). The voltage-dependence of  $\text{Ca}^{2+}$  current blockage by divalent cations suggests that they interact within the ion channel. Thus, two additional criteria indicate that the inward  $\text{Ca}^{2+}$  current in XO neurones is generated by HVA channels: (a) the permeability to  $\text{Ba}^{2+}$  was higher than that to  $\text{Ca}^{2+}$  and (b) the blockage exerted by  $\text{Cd}^{2+}$  was greater than that exerted by  $\text{Ni}^{2+}$  (Tsien et al., 1988).

Dihydropyridines (DHPs), at concentrations of  $10 \mu\text{mol l}^{-1}$ , block nearly all L-type  $\text{Ca}^{2+}$  current in ventricular myocytes and photoreceptors (Barnes and Hille, 1989; Balke et al., 1992). However, DHPs (nitrendipine, nifedipine, nimodipine or Bay K-8644) at concentrations of  $20 \mu\text{mol l}^{-1}$  and phenylalkylamines (verapamil or D-600) at concentrations of  $20 \mu\text{mol l}^{-1}$  had no effect on the  $\text{Ca}^{2+}$  current, indicating that the crayfish XO neurones do not express an L-type  $\text{Ca}^{2+}$  current.

One common feature of L-, N-, P-, Q- and R-type currents is their activation over the same range of membrane potentials, and it is difficult to distinguish them by their kinetics,

permeability and blockage by inorganic cations (Usowics et al., 1992). Thus, the identification of HVA  $\text{Ca}^{2+}$  currents is based mainly on pharmacological tests. In the XO neurone somata, relatively high concentrations of  $\omega$ -agatoxin-IVA ( $200 \text{ nmol l}^{-1}$ ) blocked 85 % of the total  $\text{Ca}^{2+}$  current. These results suggest that the  $\text{Ca}^{2+}$  channels expressed in XO neurones share the pharmacological properties of P-type  $\text{Ca}^{2+}$  channels, with less specificity for  $\omega$ -agatoxin-IVA than the  $\text{Ca}^{2+}$  channels of mammalian neurones (Brown et al., 1994; Llinás et al., 1992; Mintz et al., 1992). For instance, in cerebellar Purkinje neurones,  $\omega$ -agatoxin-IVA has a high selectivity for P-type  $\text{Ca}^{2+}$  channels with a dissociation constant  $K_d$  of  $2\text{--}10 \text{ nmol l}^{-1}$  (Mintz et al., 1992). However, in the marine crab *Cardisoma carnifex*, high concentrations of  $\omega$ -agatoxin-IVA ( $500 \text{ nmol l}^{-1}$ ) did not affect the  $\text{Ca}^{2+}$  current or peptide release in either freshly dissociated XO neurones (Richmond et al., 1995) or peptidergic terminals (Richmond et al., 1996), even at the low extracellular  $\text{Ca}^{2+}$  concentration at which the toxin appears to be more effective. In contrast, transmitter release at the neuromuscular junction (Araque et al., 1994) and the  $\text{Ca}^{2+}$  current in motoneurones (Hong and Lnenicka, 1997) from the freshwater crayfish are affected by concentrations of  $\omega$ -agatoxin-IVA between 30 and  $600 \text{ nmol l}^{-1}$ . In the present study, the  $\text{Ca}^{2+}$  current in crayfish XO neurones was blocked by  $\omega$ -agatoxin-IVA at a low extracellular  $\text{Ca}^{2+}$  concentration ( $5 \text{ mmol l}^{-1}$ ); at a normal extracellular  $\text{Ca}^{2+}$  concentration ( $13.5 \text{ mmol l}^{-1}$ ),  $\omega$ -agatoxin-IVA was ineffective. *Cardisoma carnifex* XO neurones, in which peptide toxins have no effect on the  $\text{Ca}^{2+}$  current, may express R-type  $\text{Ca}^{2+}$  channels differing from the  $\text{Ca}^{2+}$  channels expressed in the crayfish XO neurones, which appear to be P-type  $\text{Ca}^{2+}$  channels.

Recently, R. Alvarado-Alvarez, E. Becerra and U. García (in preparation) have suggested that the P-type  $\text{Ca}^{2+}$  current participates in secretory activity, and they have developed a sensitive bioassay to demonstrate this. Their assay is based on the pigmentary matrix retraction of erythrophores cultured together with identified XO neurones that produce red pigment concentrating hormone. Both neuronal  $\text{Ca}^{2+}$  currents, evoked by depolarizing command pulses, and neuronal firing, induced by depolarizing current injection, were able to induce aggregation on the target cells.

We discounted the existence of N- and Q-type  $\text{Ca}^{2+}$  channels in crayfish XO neurones because  $\omega$ -conotoxin-GVIA, which acts selectively on N-type  $\text{Ca}^{2+}$  channels, did not affect the magnitude or the time course of the  $\text{Ca}^{2+}$  current in these neurones (Fig. 7B,C). Furthermore, the Q-type channel is resistant to low doses of  $\omega$ -agatoxin-IVA ( $30 \text{ nmol l}^{-1}$ ), but is sensitive to micromolar concentrations of  $\omega$ -conotoxin-MV1C (Ellinor et al., 1993), whereas the opposite occurs in XO neurones.

These results do not exclude the existence of R-type  $\text{Ca}^{2+}$  channels in crayfish XO neurones, since 15 % of the total  $\text{Ca}^{2+}$  current was resistant to  $\omega$ -agatoxin-IVA, even at  $500 \text{ nmol l}^{-1}$ . We suggest that the remaining current could be similar to that described in crab XO neurones (Richmond et al., 1995).

We thank Leopoldo Gonzalez Santos and Benita Mendiola for valuable technical assistance. U.G. was supported by CONACyT grant 1402-N9206.

## References

- Adams, D. J. and Gage, P. W. (1979). Characteristics of sodium and calcium conductance changes produced by membrane depolarization in an *Aplysia* neurone. *J. Physiol., Lond.* **289**, 143–161.
- Almers, W., Stanfield, P. R. and Stühmer, W. (1983). Lateral distribution of sodium and potassium channels in frog skeletal muscle: measurements with a patch-clamp technique. *J. Physiol., Lond.* **336**, 261–284.
- Angstadt, J. D. and Calabrese, R. L. (1991). Calcium currents and graded synaptic transmission between heart interneurons of the leech. *J. Neurosci.* **11**, 746–759.
- Aosaki, T. and Kasai, H. (1989). Characterization of two kinds of high-voltage-activated Ca-channel currents in chick sensory neurons: Differential sensitivity to dihydropyridines and  $\omega$ -conotoxin GVIA. *Pflügers Arch.* **414**, 150–156.
- Araque, A., Clarac, F. and Bruño, W. (1994). P-type  $\text{Ca}^{2+}$  channels mediate excitatory and inhibitory synaptic transmitter release in crayfish muscle. *Proc. Natl. Acad. Sci. USA* **91**, 4224–4228.
- Armstrong, C. M. (1981). Sodium channels and gating currents. *Physiol. Rev.* **61**, 644–683.
- Ashcroft, F. M. and Stanfield, P. R. (1982). Calcium inactivation in skeletal muscle fibers of the stick insect *Carausius morosus*. *J. Physiol., Lond.* **330**, 349–372.
- Balke, C. W., Rose, W. C., Marban, E. and Wier, W. G. (1992). Macroscopic and unitary properties of physiological ion flux through T-type  $\text{Ca}^{2+}$  channels in guinea-pig heart cells. *J. Physiol., Lond.* **456**, 247–265.
- Barnes, S. and Hille, B. (1989). Ionic channels of the inner segment of tiger salamander cone photoreceptors. *J. Gen. Physiol.* **94**, 719–743.
- Belluzzi, O. and Sacchi, O. (1989). Calcium currents in the normal adult rat sympathetic neurone. *J. Physiol., Lond.* **412**, 493–512.
- Branchaw, J. L., Banks, M. I. and Jackson, M. B. (1997).  $\text{Ca}^{2+}$ - and voltage-dependent inactivation of  $\text{Ca}^{2+}$  channels in nerve terminals of the neurohypophysis. *J. Neurosci.* **17**, 5772–5781.
- Brown, A. M., Sayer, R. J., Schwandt, P. C. and Crill, W. E. (1994). P-type calcium channels in rat neocortical neurones. *J. Physiol., Lond.* **475**, 197–205.
- Carbone, E. and Lux, H. D. (1984). A low voltage activated, fully inactivating  $\text{Ca}^{2+}$  channel in vertebrate sensory neurones. *Nature* **310**, 501–502.
- Chad, J. E. and Eckert, R. (1984). Calcium 'domains' associated with individual channels may account for anomalous voltage relations of Ca-dependent responses. *Biophys. J.* **45**, 993–999.
- Coulter, D. A., Huguenard, J. P. and Prince, D. A. (1989). Characterization of ethosuximide reduction of low-threshold calcium current in thalamic neurons. *Ann. Neurol.* **25**, 582–593.
- Ellinor, P. T., Zhang, J. F., Randall, A. D., Zhou, M., Schwarz, T. L., Tsien, R. W. and Horne, W. A. (1993). Functional expression of a rapidly inactivating neuronal calcium channel. *Nature* **363**, 455–458.
- Fenwick, E. M., Marty, A. and Neher, E. (1982). Sodium and calcium channels in bovine chomaffin cells. *J. Physiol., Lond.* **331**, 599–635.
- Fossier, P., Baux, G. and Tauc, L. N. (1994). P-type  $\text{Ca}^{2+}$  channels

- are involved in acetylcholine release at a neuronal synapse: only the N-type channel is the target of neuromodulators. *Proc. Natl. Acad. Sci. USA* **91**, 4771–4775.
- Fox, A. P., Nowicky, M. C. and Tsien, R. W.** (1987). Kinetics and pharmacological properties distinguishing three types of calcium currents in chick sensory neurones. *J. Physiol., Lond.* **394**, 149–172.
- Frankenhaeuser, B. and Hodgkin, A. L.** (1957). The action of calcium on the electrical properties of squid axons. *J. Physiol., Lond.* **137**, 218–244.
- García, U., Grumbacher-Reinert, S., Bookman, R. and Reuter, H.** (1990). Distribution of  $Na^+$  and  $K^+$  currents in soma, axons and growth cones of leech Retzius neurones in culture. *J. Exp. Biol.* **150**, 1–17.
- Goldman, D. E.** (1943). Potential, impedance and rectification in membranes. *J. Gen. Physiol.* **27**, 37–60.
- Gutnick, M. J., Lux, H. D., Swandulla, D. and Zucker, H.** (1989). Voltage-dependent and calcium-dependent inactivation of calcium channel current in identified snail neurones. *J. Physiol., Lond.* **412**, 197–220.
- Hagiwara, S. and Byerly, L.** (1981). Calcium channel. *Annu. Rev. Neurosci.* **4**, 69–125.
- Hagiwara, S. and Ohmori, H.** (1982). Studies of calcium channels in rat clonal pituitary cells with patch electrode voltage clamp. *J. Physiol., Lond.* **331**, 231–252.
- Haydon, P. G. and Man-Son-Hing, H.** (1988). Low- and high-voltage-activated calcium currents: their relationship to the site of neurotransmitter release in an identified neuron of *Helisoma*. *Neuron* **1**, 919–927.
- Herrington, J. and Lingle, C. J.** (1992). Kinetic and pharmacological properties of low voltage-activated  $Ca^{2+}$  current in rat clonal (GH<sub>3</sub>) pituitary cells. *J. Neurophysiol.* **68**, 213–232.
- Hess, P., Lansman, J. B. and Tsien, R. W.** (1984). Different modes of  $Ca^{2+}$  channel gating behaviour favoured by dihydropyridine  $Ca^{2+}$  agonists and antagonists. *Nature* **311**, 538–544.
- Hillyard, D. R., Monje, V. D., Mintz, I. M., Bean, B. P., Nadasdi, L., Ramachandan, J., Miljanich, G., Azimi-Zoonooz, A., McIntosh, J. M., Cruz, L. J., Imperial, J. S. and Olivera, B. M.** (1992). A new conus peptide ligand for mammalian presynaptic  $Ca^{2+}$  channels. *Neuron* **9**, 69–77.
- Hodgkin, A. L. and Huxley, A. F.** (1952). A quantitative description of membrane current and its application to conduction and excitation in nerve. *J. Physiol., Lond.* **117**, 500–544.
- Hodgkin, A. L. and Katz, B.** (1949). The effect of sodium ions on the electrical activity of the giant axon of the squid. *J. Physiol., Lond.* **108**, 37–77.
- Hong, S. J. and Lnenicka, G. A.** (1997). Characterization of a P-type calcium current in a crayfish motoneuron and its selective modulation by impulse activity. *J. Neurophysiol.* **77**, 76–85.
- Iwasaki, S. and Satow, I.** (1971). Sodium and calcium-dependent spike potentials in the secretory neurons soma of the X-organ of the crayfish. *J. Gen. Physiol.* **57**, 216–238.
- Kasai, H. and Neher, E.** (1992). Dihydropyridine-sensitive and  $\omega$ -conotoxin-sensitive calcium channels in mammalian neuroblastoma-glioma cell line. *J. Physiol., Lond.* **448**, 161–188.
- Kay, A. B. and Wong, R. K. S.** (1987). Calcium current activation kinetics in isolated pyramidal neurones of the CA1 region of the mature guinea-pig hippocampus. *J. Physiol., Lond.* **392**, 603–616.
- Llinás, R., Steinberg, I. Z. and Walton, K.** (1981). Presynaptic calcium currents in squid giant synapse. *Biophys. J.* **33**, 289–322.
- Llinás, R., Sugimori, M., Hillman, D. E. and Cherksey, B.** (1992). Distribution and functional significance of the P-type, voltage-dependent  $Ca^{2+}$  channels in the mammalian central nervous system. *Trends Neurosci.* **15**, 351–355.
- Llinás, R., Sugimori, M., Lin, J. W. and Cherksey, B.** (1989). Blocking and isolation of a calcium channel from neurons in mammals and cephalopods utilizing a toxin fraction (FTX) from funnel-web spider poison. *Proc. Natl. Acad. Sci. USA* **86**, 1689–1693.
- Martínez, J. J., Onetti, C. G., García, E. and Hernández, S.** (1991). Potassium current kinetics in bursting secretory neurons: effects of intracellular calcium. *J. Neurophysiol.* **66**, 1455–1461.
- Meyers, D. E. R., Graf, R. A. and Cooke, I. M.** (1992). Ionic currents of morphologically distinct peptidergic neurons in defined culture. *J. Neurophysiol.* **67**, 1301–1315.
- Miller, R. J.** (1992). Voltage sensitive  $Ca^{2+}$  channels. *J. Biol. Chem.* **267**, 1403–1406.
- Mintz, I. M., Venema, V. J., Swiderek, K., Lee, T., Bean, B. P. and Adams, M. E.** (1992). P-type calcium channels blocked by the spider toxin  $\omega$ -Aga-IVA. *Nature* **355**, 827–829.
- Mori, Y.** (1994). Molecular biology of voltage-dependent calcium channels. In *Handbook of Membrane Channels: Molecular and Cellular Physiology* (ed. C. Peracchia), pp. 163–176. San Diego, CA: Academic Press Inc.
- Onetti, C. G., García, U., Valdiosera, R. F. and Aréchiga, H.** (1990). Ionic currents in crustacean neurosecretory cells. *J. Neurophysiol.* **64**, 1514–1526.
- Onetti, C. G., Lara, J. and García, E.** (1996). Adenine nucleotides and intracellular  $Ca^{2+}$  regulate a voltage-dependent and glucose-sensitive potassium channel in neurosecretory cells. *Pflügers Arch.* **432**, 144–154.
- Plant, T. D., Standen, N. B. and Ward, T. A.** (1983). The effects of injection of calcium ions and calcium chelators on calcium channel inactivation in *Helix* neurones. *J. Physiol., Lond.* **334**, 189–212.
- Plummer, M. R., Logothetis, D. E. and Hess, P.** (1989). Elementary properties and pharmacological sensitivities of calcium channels in mammalian peripheral neurons. *Neuron* **2**, 1453–1463.
- Randall, A. and Tsien, R. W.** (1995). Pharmacological dissection for multiple types of  $Ca^{2+}$  channels currents in rat cerebellar granule neurons. *J. Neurosci.* **15**, 2995–3012.
- Renaud, L. P.** (1988). Electrophysiology of a peptidergic neuron. The hypothalamic magnocellular neurosecretory cell. In *Neurotransmitters and Cortical Function* (ed. M. Avoli, T. A. Reader, R. W. Dykes and O. Gloor), pp. 495–515. New York: Plenum.
- Richmond, J. E., Penner, R., Keller, R. and Cooke, I. M.** (1996). Characterization of the  $Ca^{2+}$  current in isolated terminals of crustacean peptidergic neurons. *J. Exp. Biol.* **199**, 2053–2059.
- Richmond, J. E., Sher, E. and Cooke, I. M.** (1995). Characterization of the  $Ca^{2+}$  current in freshly dissociated crustacean peptidergic neuronal somata. *J. Neurophysiol.* **73**, 2357–2368.
- Sala, F.** (1991). Activation kinetics of calcium currents in bull-frog sympathetic neurones. *J. Physiol., Lond.* **437**, 221–238.
- Sather, W. A., Tanabe, T., Zhang, J. F., Mori, Y., Adams, M. E. and Tsien, R. W.** (1993). Distinctive biophysical and pharmacological properties of class A (BI) calcium channel  $\alpha_1$  subunits. *Neuron* **11**, 291–303.
- Snutch, T. P. and Reiner, P. B.** (1992).  $Ca^{2+}$  channels: diversity of form and function. *Curr. Opin. Neurobiol.* **2**, 247–253.

- Stuenkel, E. L.** (1985). Simultaneous monitoring of electrical and secretory activity in peptidergic neurosecretory terminals of the crab. *J. Physiol., Lond.* **359**, 163–187.
- Swandulla, D., Carbone, E. and Lux, H. D.** (1991). Do calcium channel classifications account for neuronal calcium channel diversity? *Trends Neurosci.* **14**, 46–51.
- Tang, C., Presser, F. and Morad, M.** (1988). Amiloride selectively blocks the low threshold (T) calcium channels. *Science* **240**, 213–215.
- Tsien, R. W., Lipscombe, D., Madison, D. V., Bley, K. R. and Fox, A. P.** (1988). Multiple types of neuronal calcium channels and their selective modulation. *Trends Neurosci.* **11**, 431–438.
- Tsien, R. W. and Tsien, R. Y.** (1990). Calcium channels, stores and oscillations. *Annu. Rev. Cell Biol.* **6**, 715–760.
- Usovich, M. M., Sugimori, M., Cherksey, B. and Llinás, R.** (1992). P-type calcium channels in the somata and dendrites of adult cerebellar Purkinje cells. *Neuron* **9**, 1185–1199.
- Wang, G., Dayanithi, G., Kim, S., Hom, D., Nadasdi, L., Kristipati, R., Ramachandran, J., Stuenkel, E. L., Nordman, J. J., Newcomb, R. and Lemos, J. R.** (1997). Role of Q-type  $\text{Ca}^{2+}$  channels in vasopressin secretion from neurohypophysial terminals of the rat. *J. Physiol., Lond.* **502**, 351–363.
- Wang, G. and Lemos, J. R.** (1994). Effects of funnel web spider toxin on  $\text{Ca}^{2+}$  currents in neurohypophysial terminals. *Brain Res.* **663**, 215–222.
- Zhang, J. F., Randall, A. D., Ellinor, P. T., Horne, W. A., Sather, W. A., Tanabe, T., Schwarz, T. L. and Tsien, R. W.** (1993). Distinctive pharmacology and kinetics of cloned neuronal  $\text{Ca}^{2+}$  channels and their possible counterparts in mammalian CNS neurons. *Neuropharmac.* **32**, 1075–1088.
